# Supplementary material for: Assessment of walking disorder in community-dwelling Japanese middle-aged and elderly women using an inertial sensor
Source: PeerJ. 2021 Apr 14;9:e11269. doi: 10.7717/peerj.11269 (PMC8052961; doi:10.7717/peerj.11269)
Supplement: Supplemental Information 1 [file peerj-09-11269-s001.xlsx]

## Sheet: Add normalize data revised RawD
cord	age	height	weight	twosteps	handgrip	walkingspeed	ankle power	AP normalize
1	88	148	46	1.02027	17	0.963391	2.29986	0.0499969
1	86	143	41	1.25874	16	1.17647	1.33507	0.0325626
1	86	140	42	1.21429	15	0.859107	0.761994	0.0181427
1	85	148	54	0.763514	21	0.805153	2.04886	0.0379419
1	84	149	45	1.04027	20	0.884956	1.65436	0.0367636
1	83	152	43	1.31579	22	1.22549	3.41907	0.0795133
1	83	145	49	1.36552	20	1.19617	1.6062	0.0327796
1	83	162	61	1.11111	19	0.990099	3.41507	0.0559847
1	82	146	48.1	1.0274	19	1.13507	2.91405	0.0605831
1	82	151	48	1.39073	22	1.3624	2.75924	0.0574841
1	82	145	43	1.2069	18	1.32626	2.45215	0.0570268
1	81	152	50	1.41447	19	1.14943	2.50321	0.0500643
1	81	156	48	1.37821	21	1.3587	2.46912	0.0514401
1	81	159	45	1.27673	18	1.15207	2.15726	0.047939
1	80	150	50	1.02	24	1.41643	3.35393	0.0670785
1	80	150	45	1.5	20	1.6835	3.14368	0.0698596
1	80	147	48	1.08844	20	1.2987	2.70127	0.0562764
1	80	155	46	1.41935	22	1.53374	2.20329	0.0478976
1	80	153	60	1.07843	25	1.11607	3.60118	0.0600197
1	80	152	51	1.51316	23	1.52905	2.9167	0.0571902
1	81	162	50	1.44321	27	1.25945	2.8513	0.057026
1	81	153	50.5	1.20915	19	1.33333	3.03821	0.0601625
1	84	155	50	1.09677	17	1.16279	2.78674	0.0557348
1	80	150	52	1.16667	20	1.21976	2.89078	0.0555919
1	82	149	50	1.20805	19	1.18483	2.75446	0.0550892
1	80	148	47	1.4527	21	1.66667	2.79661	0.0595023
2	79	162	54	1.45062	24.5	1.3587	3.69272	0.0683838
2	79	163	55	1.41104	25	1.17647	3.66128	0.0665688
2	79	153	49	1.40523	20	1.40056	2.80527	0.0572504
2	79	148	44	1.08108	22	1.07296	2.69146	0.0611695
2	78	156	50	1.50641	25	1.47059	4.06974	0.0813947
2	77	157	50	1.46497	23	1.40056	3.54747	0.0709494
2	77	156	56	1.3141	19	1.36612	3.14631	0.0561842
2	77	148	52	1.41892	18	1.52439	3.0979	0.059575
2	77	153.5	52.5	1.40065	21	1.4245	2.89852	0.0552099
2	77	148	51	1.48649	20	1.37741	3.28402	0.0643925
2	76	160	62	1.28125	25	1.68919	4.96965	0.0801556
2	76	151	47	1.45695	25	1.46199	2.94549	0.06267
2	76	149	38	1.20805	15	1.46628	2.43491	0.0640767
2	75	155	55	1.35484	19	1.39665	3.79672	0.0690313
2	75	150	57	1.26667	25	1.21655	2.43793	0.0427708
2	75	159	62.5	1.38365	26	1.29534	3.99662	0.063946
2	74	146	52	1.30137	21	1.19617	3.92965	0.0755702
2	74	154	47	1.42857	26	1.41643	2.32652	0.0495004
2	74	154	62	1.2013	25	1.43678	4.33145	0.069862
2	73	158	54	1.4557	30	1.92308	4.85332	0.0898764
2	73	156	58	1.51282	26	1.66113	4.3601	0.0751742
2	73	159	59	1.13208	24	1.07991	4.17426	0.0707501
2	73	148	51	1.2973	29	1.38122	3.41946	0.0670482
2	73	154	48	1.33117	16	1.41243	2.70127	0.0562764
2	73	165	48	1.15152	24	1.0661	1.69548	0.0353225
2	72	153	42	1.43791	21	1.57233	2.54156	0.0605134
2	71	160	49	1.375	28	1.51515	3.46297	0.0706729
2	71	154	53	1.42857	28	1.46199	3.39545	0.064065
2	71	156	56	1.41026	21	1.42045	3.12721	0.0558431
2	71	163	49	1.59509	21	1.65017	2.90198	0.059224
2	71	152	46.5	1.60526	22	1.37741	2.64211	0.0568196
2	71	155	52	1.30968	24	1.37363	2.96259	0.056973
2	71	150	42	1.33333	19	1.30208	1.43907	0.0342635
2	71	157	51	1.33758	12	1.20192	2.74252	0.0537749
2	70	161	77	1.30435	26	1.5625	5.6979	0.0739987
2	70	151	64	1.35762	25	1.17925	3.78517	0.0591433
2	70	158	56	1.41772	35	1.58228	3.18505	0.0568759
2	70	148	47	1.21622	20	1.21655	2.51993	0.0536156
2	70	157	48	1.27389	16	1.05485	2.56583	0.0534548
2	70	149	49	1.34228	16	1.57233	2.92148	0.059622
3	69	162	49	1.60494	30	1.68919	3.3469	0.0683041
3	69	156	49	1.47436	19	1.40845	3.19223	0.0651475
3	69	157	48	1.52866	24	1.17647	2.91405	0.0607093
3	69	167	64	1.37725	25	1.5674	4.77146	0.0745541
3	68	143	60	1.46853	25	1.3587	4.56824	0.0761373
3	68	149	53	1.12081	24	1.40845	4.11099	0.0775658
3	68	155	52	1.54839	28	1.51515	3.62017	0.0696186
3	68	156	48	1.47436	23	1.59744	2.85608	0.0595016
3	68	153	54	1.45752	29	1.36612	2.7644	0.0511927
3	68	159	53	1.51572	29	1.0846	2.5056	0.0472754
3	68	145	53	1.41379	21	1.51057	3.1247	0.0589566
3	68	153	53	1.33987	16	1.45773	3.20204	0.0604158
3	68	148	45	1.38514	15	1.44509	2.52458	0.0561017
3	67	150	47	1.33333	25	1.40845	4.20266	0.0894183
3	67	150	55	1.5	17.5	1.4245	3.29383	0.0598878
3	67	155	58	1.22581	19	1.0395	2.56144	0.0441627
3	67	156	48	1.26282	31	1.14416	2.48849	0.0518436
3	67	152	55	1.25	20	1.0989	2.84904	0.0518007
3	66	148	49	1.27027	23	1.04603	2.1477	0.0438306
3	66	157	50	1.33758	21	1.11607	1.84551	0.0369102
3	66	150	53	1.5	25	1.68919	3.43405	0.0647934
3	65	155	44	1.41935	27	1.70648	2.71083	0.0616097
3	65	156	50	1.34615	18	1.06838	3.19939	0.0639877
3	65	157	49	1.36943	28	1.62338	3.59815	0.0734316
3	64	155	51	1.35484	22	1.5873	3.5354	0.0693215
3	64	165	51	1.51515	32	1.60772	2.78112	0.0545318
3	63	160	49	1.1875	28	1.47929	4.27522	0.0872494
3	63	161	58	1.49068	30	1.63934	3.74127	0.0645046
3	63	157	47	1.21019	24	1.06383	1.66895	0.0355096
3	63	154	55	0.974026	20	1.14416	3.48724	0.0634043
3	62	156	59	1.15385	22	0.840336	2.56873	0.0435378
3	62	157	47	1.33758	27.5	1.67785	3.97051	0.084479
3	61	159	50	1.50943	35	2.02429	4.1277	0.0825541
3	61	155	56	1.48387	24	1.29534	2.68229	0.047898
3	61	151	45	1.52318	22	1.3089	2.44737	0.0543861
3	61	152	57	1.48026	22.5	1.09649	3.73398	0.0655083
3	61	162	50	1.2037	15	1.03734	1.76831	0.0353661
3	60	155	58	1.64516	30	1.70648	4.65049	0.0801809
3	60	147	49	1.29252	18	1.51057	2.95994	0.060407
3	60	148	48	1.08108	31	1.10865	2.31431	0.0482149
3	60	156	48	1.41026	19	1.34048	2.27585	0.0474135
3	60	162	49	1.48148	32	1.30208	2.30251	0.04699
4	59	159	50	1.32075	18	1.26263	3.33469	0.0666939
4	59	157	56	1.43312	21	1.5674	4.40362	0.0786361
4	57	162	65	1.41975	27	1.55763	5.68771	0.0875032
4	57	164	51	1.15854	28	1.54321	4.73473	0.0928379
4	57	158	46	1.64557	26.1	1.93798	4.52435	0.0983555
4	57	153	50	1.30719	23	1.63399	3.52824	0.0705648
4	57	160	59	1.375	34	1.32626	3.11023	0.0527157
4	57	159	47	1.32075	28	1.29534	2.92612	0.0622579
4	57	152	47	1.64474	24	1.57729	3.19687	0.0680185
4	57	153	44	1.04575	15	0.888099	1.62756	0.0369901
4	56	153	48	1.37255	25	1.36612	2.6819	0.0558729
4	55	160	52	1.4375	21	2.18341	4.00699	0.0770574
4	55	160	43	1.25	15	1.49254	2.1233	0.0493791
4	54	162	52	1.2963	26	1.5625	3.6394	0.0699884
4	54	164	54	1.34146	26	1.73611	3.46071	0.0640872
4	54	159	50	1.60377	29	1.51057	3.00597	0.0601195
4	53	152	50	1.64474	25	1.36612	2.8513	0.057026
4	53	163	54	1.28834	23.5	1.0352	3.30604	0.0612229
4	53	162	54	1.35802	26	1.40449	2.72567	0.0504753
4	53	156	62	1.28205	21.5	1.06383	3.53844	0.0570715
4	53	165	42	1.30303	16	1.36986	2.01917	0.0480754
4	52	168	59	1.30952	28	1.38889	3.05226	0.0517332
4	52	156	49	1.41026	19	1.3587	3.52108	0.0718587
4	52	157	52	1.46497	19	1.32626	3.62003	0.069616
4	51	158	51	1.13924	20	1.37363	2.4138	0.0473295
4	51	159	60	1.32075	22	1.2285	3.91053	0.0651756
4	50	160	58	1.40625	34	1.47493	4.61162	0.0795107
4	50	171	60	1.52047	27	1.45349	3.52371	0.0587285
